# Supplementary material
Source: HighWire-hosted journal article supplement (https://jitc.bmj.com/content/8/2/e001250)

### CD4 T cells

Figure S5A

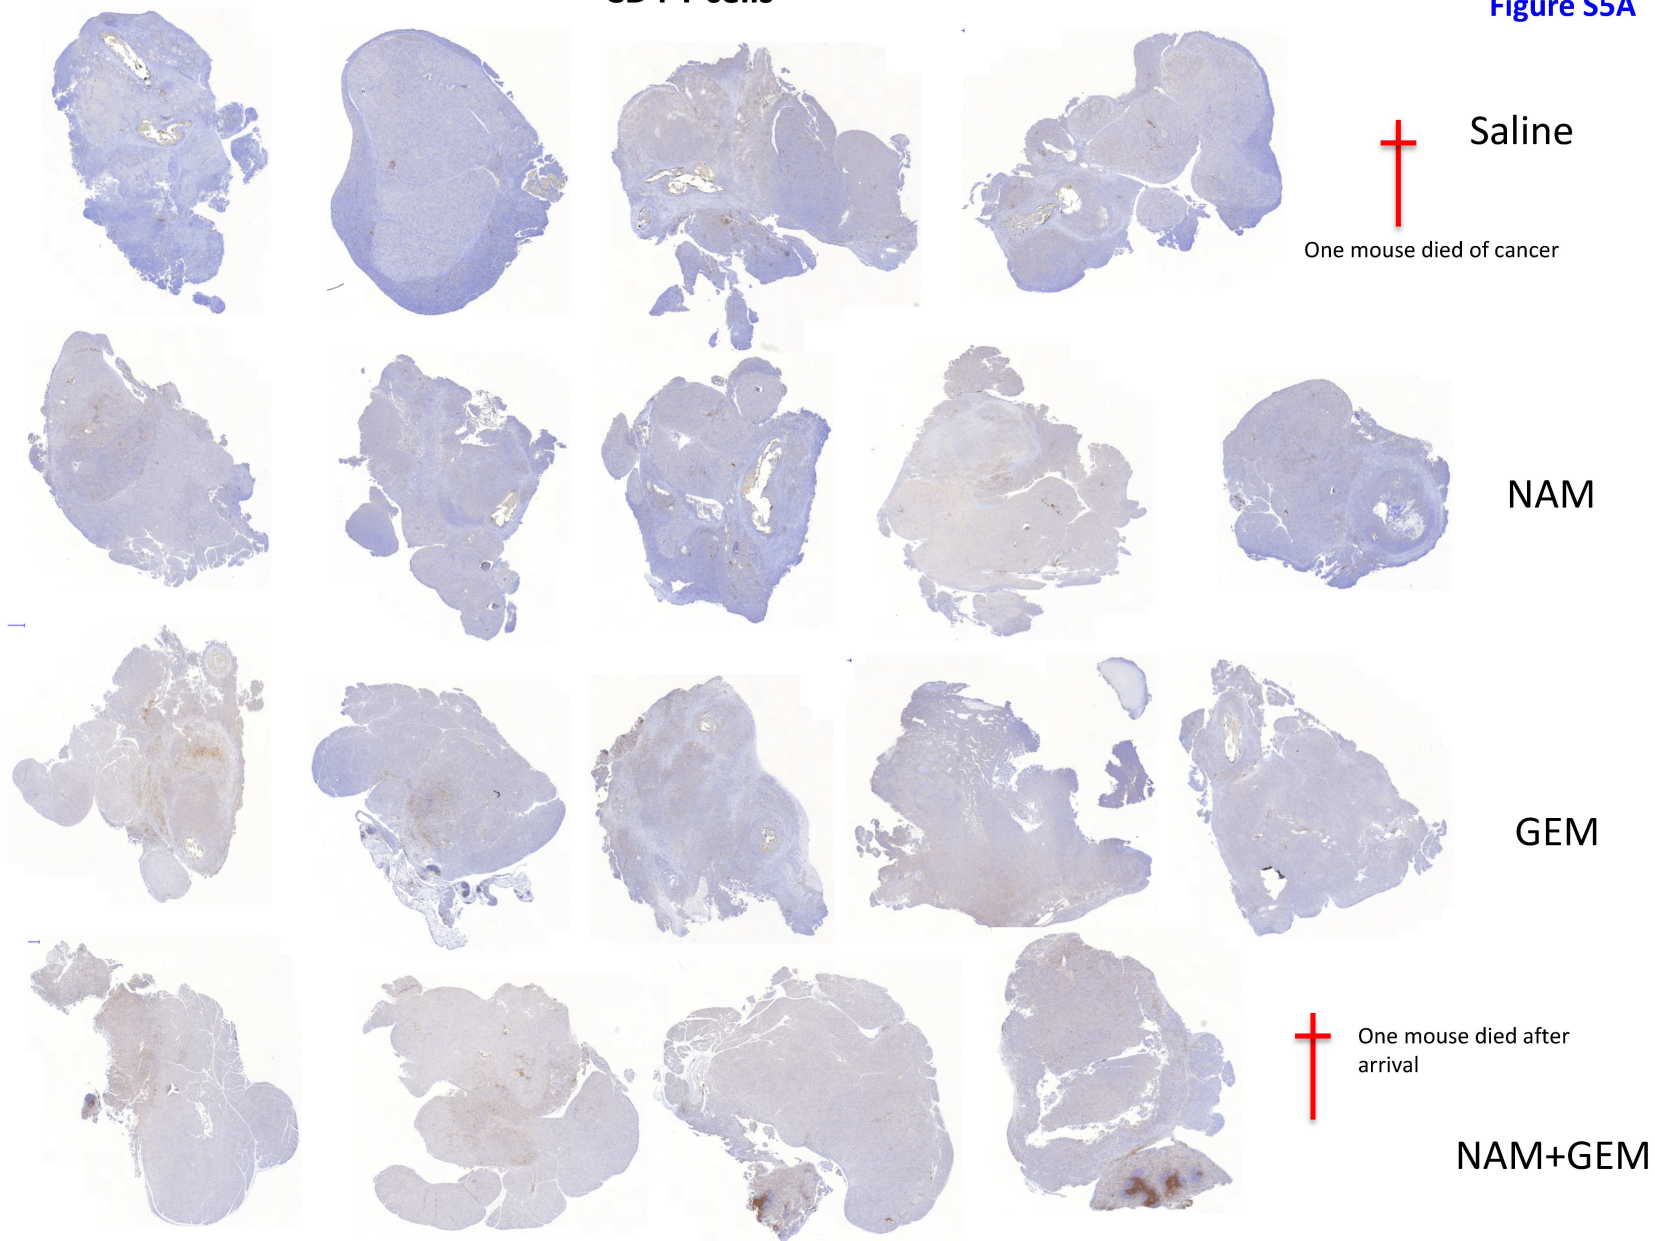

Figure S5B

## CD8 T cells

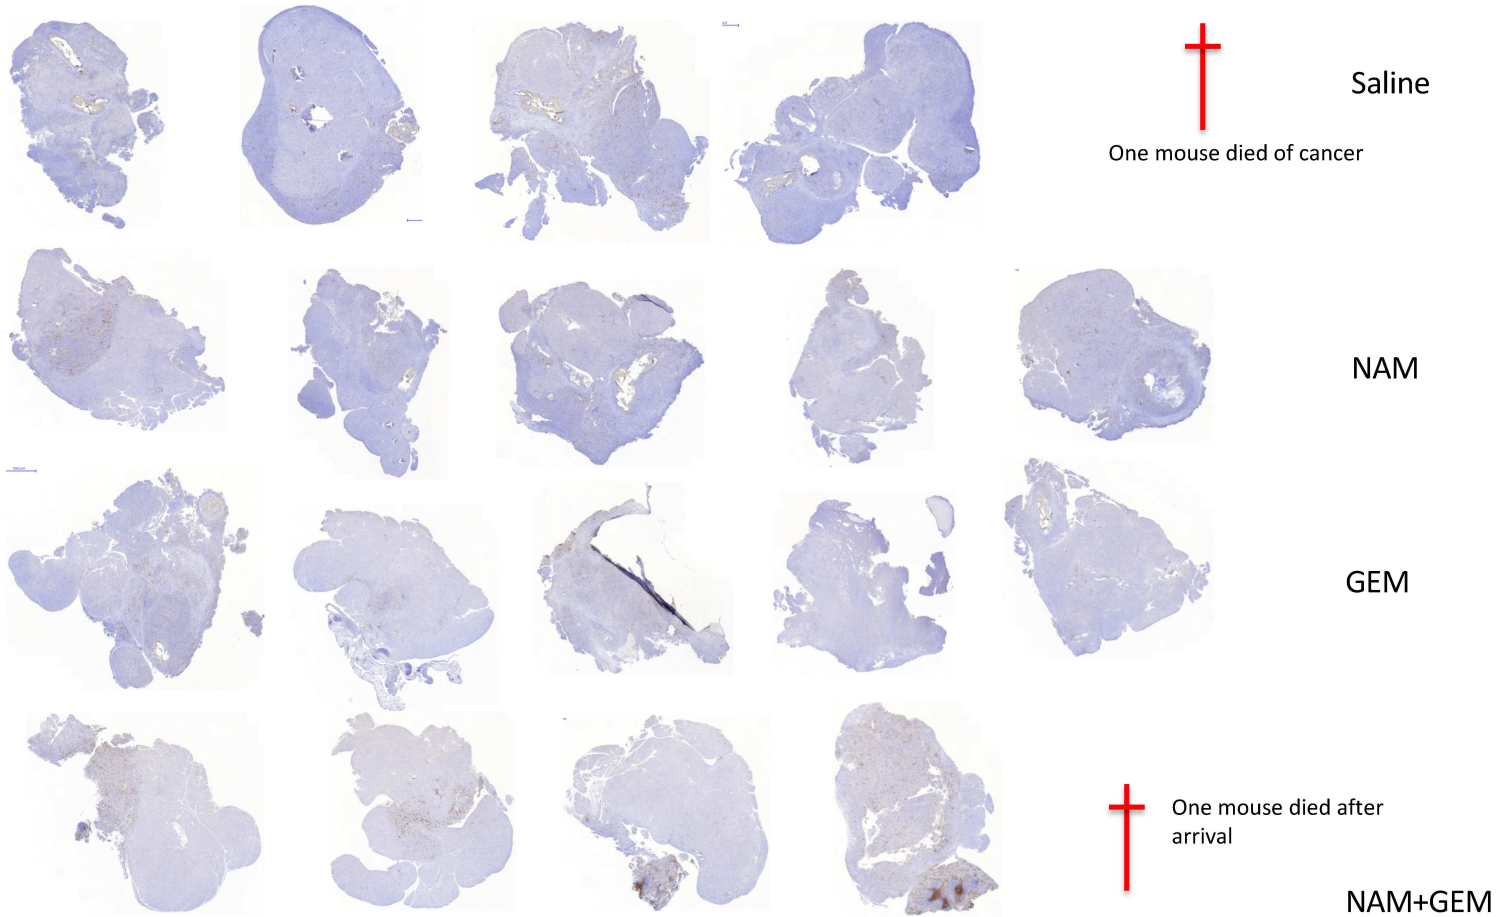

Figure S5C

### Granzyme B production in orthotopic Panc-02 tumors

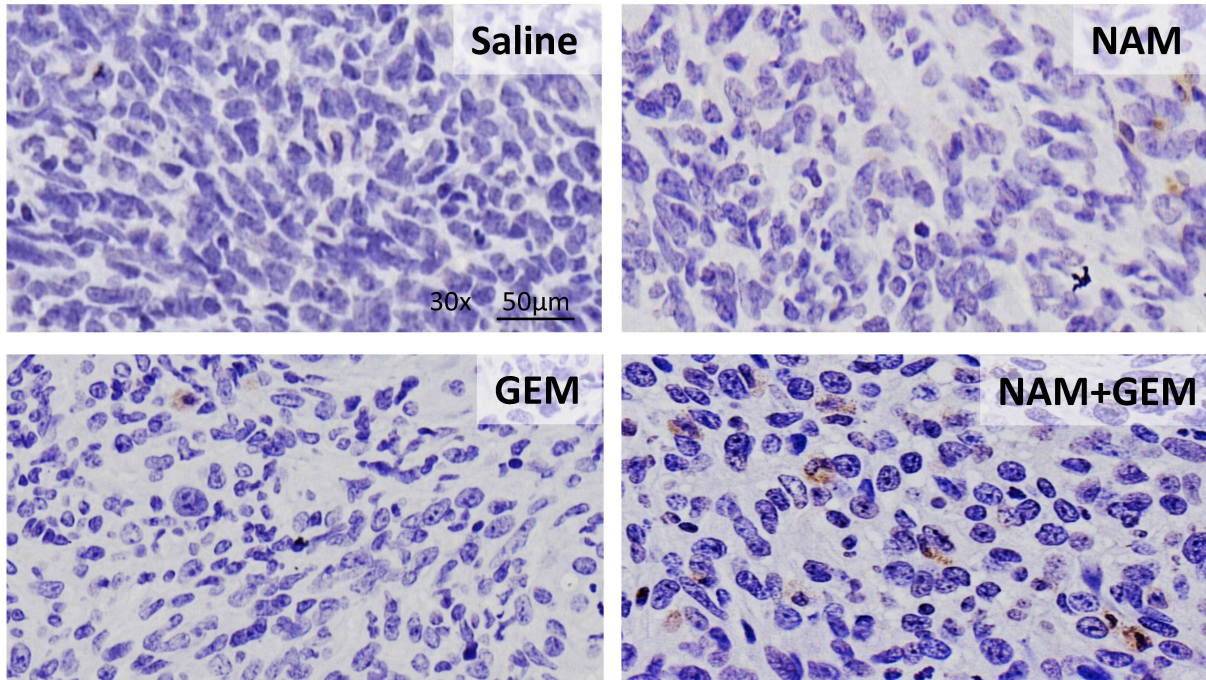

Figure S5D

**Perforin production in orthotopic Panc-02 tumors**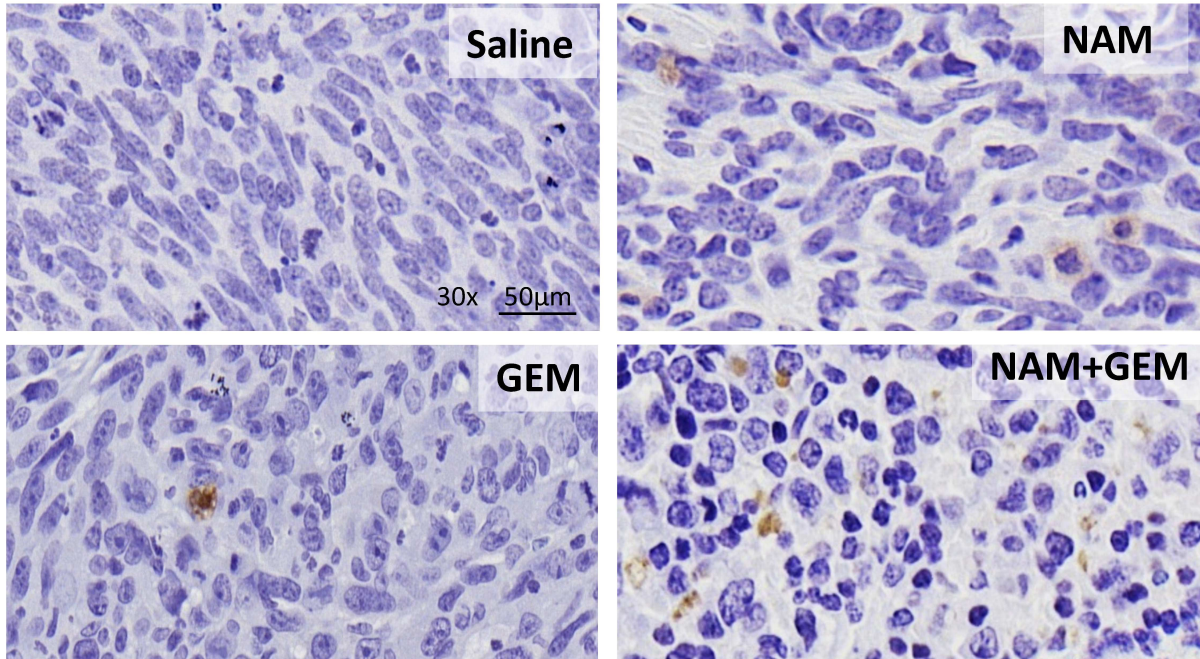

Supplement: inline-supplementary-material-7 [file inline-supplementary-material-7.pdf]
